# Supplementary material
Source: publisher site journal article supplement (https://www.dovepress.com/article/389456)
Supplement: Supplementary file 1 [file get_supplementary_file.php]

# Supplementary tables

**Supplementary Table 1.** Description of nine Markov health states

| **CKD stage** | **Description** |
| --- | --- |
| CKD 1 | Defined as patients who have eGFR ≥ 90 mL/min per 1.73 m2. 2;52 Patients either remain in this state or those who do not respond to treatment transition to CKD stage 2 or death. |
| CKD 2 | Patients who have eGFR ≥ 60 to 89 mL/min per 1.73 m2.2;52 Patients either remain in this state, transition to CKD stage 1, or transition to CKD stage 3a or death. |
| CKD 3a | Patients who have eGFR ≥ 45 to 59 mL/min per 1.73 m2.2;52 Patients either remain in this state, transition to CKD stage 2, or transition to CKD stage 3b or death. |
| CKD 3b | Patients who have eGFR ≥ 30 to 44 mL/min per 1.73 m2.2;52 In this state, patients either remain, transition to CKD stage 3a, or worsen and transition into CKD stage 4 or death. |
| CKD 4 | Patients who have eGFR ≥ 15 to 29 mL/min per 1.73 m2.2;52 No patients begin the model in this state. Patients can transition into CKD stage 4 from CKD stage 3b after the first cycle. Patients in subsequent cycles in this state can transition from CKD stage 4 to CKD stage 3b or worsen to ESRD with or without dialysis, or death. |
| ESRD without dialysis | No patients begin the model in this state. Patients can transition into this state from CKD stage 4 after the first cycle. Patients in subsequent cycles can remain in this state or worsen and transition into the post-transplant state or death. |
| ESRD with dialysis | No patients begin the model in this state. Patients can transition into this state from ESRD without dialysis after the first cycle. Patients in subsequent cycles can remain in this state or worsen and transition into the post-transplant state or death. |
| Post-transplant | No patients begin the model in this state. Patients can transition into this state from ESRD without or with dialysis after the first cycle. Patients in subsequent cycles can remain in this state or transition to death. |
| Mortality | Terminal state |

**Abbreviations:** AE, adverse event; CKD, chronic kidney disease; eGFR, estimated glomerular filtration rate; ESRD, end-stage renal disease.

**Note:** Patients in each health state (except death) experience the respective costs (drug, AE, routine care, productivity loss) and CKD stage and AE related utility.

**Supplementary Table 2.** Cost-effectiveness analysis inputs in the base-case

| **Parameter** | **Value** | **Source** |
| --- | --- | --- |
| **General** | | |
| Starting age (years) | - 43 | - NefIgArd CSR (Part A full analysis set)29 |
| Discounting rate of benefits | - 3.0% | - ICER30 |
| Discounting rate of costs | - 3.0% | - ICER30 |
| Baseline year | - 2021 |  |
| Inflation rate | - 2.53% | - US Bureau of Labor Statistics (DBI)35 |
| Treatment cycle length in model | - Monthly |  |
| Horizon | - Lifetime |  |
| Comparators | - Nefecon + BSC - BSC alone |  |
| **Clinical** | | |
| CKD stage at diagnosis of IgAN | - CKD-1: 3% - CKD-2: 34% - CKD-3a: 39% - CKD-3b: 24% - CKD-4: 0% | - NefIgArd CSR (Part A full analysis set)29 |
| Proportion of patients with ESRD who required dialysis | - ESRD with dialysis: 40.51% - ESRD without dialysis: 59.49% | - Hastings et al., 201816 |
| Post-transplant complications | - Transplant failure (acute rejection): 0.3% (cycle frequency) | - USRDS annual report 2020, Chapter 6, Figure 6.1639 |
| Transition probabilities | - Refer to Supplementary Table 4 & 5. | - Transition probabilities between CKD and ESRD stages – NefIgArd (Part A full analysis set)29 - Transition probabilities to post-transplant – Kent et al., 201531 |
| AE prevalence for Nefecon | - Refer to Supplementary Table 7. | - NefIgArd CSR29 |
| AE prevalence for BSC | - Refer to Supplementary Table 7. | - NefIgArd CSR29 |
| **HRQoL** | | |
| Health-state utility values | - Refer to Supplementary Table 10. | - Gorodetskaya et al., 200548 |
| Disutilities of AE | - Refer to Supplementary Table 11. | - Acne – Assumption - Weight increase – Assumption - Hypertension – Sullivan, et al., 200653 - Headache – Xu et al., 201054 - Edema peripheral – Assumed the same as Cushingoid - Dyspepsia – Sullivan et al., 200653 - Mood swings – Assumption - Face edema – Assumed the same as Cushingoid - Cushingoid – ICER, Evidence report, Deflazacort, Eteplirsen, and Golodirsen for Duchenne Muscular Dystrophy, 201955 - Hirsutism – Assumption - Upper respiratory tract infection – Sullivan et al., 200653 - Transplant failure – Sussell et al., 2019 56 |
| **Costs** | | |
| Drug dosing | - 16 mg per administration | - NefIgArd CSR29 |
| Nefecon cost | - Unit cost: $118 - Cost per treatment cycle: $14,160 | - Calliditas Therapeutics, data on file |
| Administration cost (oral) | - $0 | - Assumption |
| Dialysis costs | - Refer toSupplementary Table 8. | - Hemodialysis – USRDS Medicare39 ($105,600) - Peritoneal dialysis – USRDS (Medicare)39 ($89,226) - Hemodialysis – Commercial ($276,295)40 - Peritoneal dialysis – Commercial ($233,453) 40 |
| Kidney transplant costs | - $453,703 (Supplementary Table 8) | - Millman, 202041 |
| AE costs outpatient | - Refer to Supplementary Table 7. | CPT Unit cost – 99213 ($68.04) applied to the following AEs:   - Acne - Weight increase – - Hypertension - Headache - Edema peripheral - Dyspepsia - Mood swings - Face edema - Cushingoid - Hirsutism - Upper respiratory tract infection |
| AE costs inpatient | - Various; refer to Supplementary Table 7. | From HCUP.net37:   - Acne – NA - Weight increase – NA - Hypertension – HCUPnet MS-DRG 305 ($28,905) - Headache – HCUPnet MS-DRG 103 ($32,279) - Edema peripheral – HCUPnet ICD-9 782.3 ($25,511) - Dyspepsia – HCUPnet ICD-9 536.8 ($41,116) - Mood swings – HCUPnet ICD-9 296.99 ($22,084) - Face edema – HCUPnet ICD-9 784.2 ($33,018) - Cushingoid – HCUPnet ICD-9 255 ($80,315) - Hirsutism – HCUPnet ICD-9 704.1 ($59,767) - Upper respiratory tract infection – HCUPnet ICD-9 465.9 ($24,100) |
| Post-transplant complications (per transplant) | - $1,212 | - Re-transplant – Millman, 202041 ($453,703) - Dialysis – USRDS39 ($8,664) |
| Cost of mortality event | - $17,057 (refer to methods section: mortality costs) | - Cost of care last 3 months of life – Kerr et al., 201742 (£6,048) |
| Indirect costs – productivity loss | - Refer to Supplementary Table 9. | - Percentage of work hours missed – Van Haalen et al., 202045 - Average weekly wage in US (USD) – Bureau of Labor and Statistics (Q1, 2021)47 |

**Abbreviations:** AE, adverse event; BSC, best supportive care; CKD, chronic kidney disease; CMS, Centers for Medicare and Medicaid Services; CPI, consumer price index; CPT, current procedural terminology; CSR, clinical study report; ESRD, end-stage renal disease; FDA, Federal Drug Administration; GVHD, graft versus host disease; HCUP, Healthcare Cost and Utilization Project; HRQoL, health-related quality of life; ICER, Institute for Clinical and Economic Review; NA, not applicable; tx, treatment; USD, United States Dollar; USRDS, United States Renal Data System.

**Supplementary Table 3.** Health state at diagnosis of IgAN

| **CKD stage** | **Patients at diagnosis (%)** |
| --- | --- |
| CKD 1* | 3% |
| CKD 2* | 34% |
| CKD 3a* | 39% |
| CKD 3b* | 24% |
| CKD 4 | 0% |
| ESRD without dialysis | 0% |
| ESRD with dialysis | 0% |
| Post-transplant | 0% |
| Total | 100% |

**Abbreviations:** CKD, chronic kidney disease; eGFR, estimated glomerular filtration rate; ESRD, end-stage renal disease; IgAN, immunoglobulin A nephropathy.

Data from Barratt et al.29

**Note:** In NefIgArd Part A, the inclusion criteria required patients to have an eGFR ≥35 mL/min per 1.73 m2 and ≤90 mL/min per 1.73m2 using the CKD-EPI formula, confirmed by the central laboratory at study visit 1 or study visit 3. As a result of averaging of results across the two visits, five patients had eGFR >90 mL/min per 1.73m2 and are classified as CKD stage 1 at baseline.

**Supplementary Table 4.** Markov transition probabilities – CKD and ESRD health states

|  | **Transition rate between health states – on-treatment (Nefecon)** | | | | | |  |
| --- | --- | --- | --- | --- | --- | --- | --- |
| **From health state** | **To health state** | | | | | |  |
| **CKD 1** | **CKD 2** | **CKD 3a** | **CKD 3b** | **CKD 4** | **ESRD** | **Total** |
| **CKD 1** | 95.4% | 4.6% |  |  |  |  | 100% |
| **CKD 2** | 1.6% | 96.4% | 2.0% |  |  |  | 100% |
| **CKD 3a** |  | 4.2% | 92.7% | 3.1% |  |  | 100% |
| **CKD 3b** |  |  | 3.1% | 95.7% | 1.2% |  | 100% |
| **CKD 4** |  |  |  | 3.1% | 95.7% | 1.2% | 100% |
|  | **Transition rate between health states – off treatment (BSC)** | | | | | |  |
| **CKD 1** | **CKD 2** | **CKD 3a** | **CKD 3b** | **CKD 4** | **ESRD** | **Total** |
| **CKD 1** | 92.9% | 7.1% |  |  |  |  | 100% |
| **CKD 2** | 0.6% | 96.1% | 3.3% |  |  |  | 100% |
| **CKD 3a** |  | 1.8% | 93.1% | 5.1% |  |  | 100% |
| **CKD 3b** |  |  | 1.3% | 96.7% | 2.0% |  | 100% |
| **CKD 4** |  |  |  | 1.3% | 96.7% | 2.0% | 100% |

**Abbreviations:** BSC, best supportive care; CKD, chronic kidney disease; ESRD, end-stage renal disease.

**Note:** Transition probabilities from the CKD 4 state were assumed to be the same as transitions from the CKD 3 state. As no patient began the trial in CKD 4, transition probabilities could not be calculated from trial data.

**Supplementary Table 5.** Transition probabilities from ESRD to post-transplant health state

| **From health state** | **Probability over study period** *( )* | **Duration of study period (*t)*** | **Instant hazard rate (r)** | **Probability per cycle used in model ( *)*** |
| --- | --- | --- | --- | --- |
| ESRD without dialysis | 0.21 | 58.80 | 0.4% | **0.4%** |
| ESRD with dialysis | 0.24 | 58.80 | 0.5% | **0.5%** |

**Abbreviations:** ESRD, end-stage renal disease.

Data from Calliditas Therapeutics AB. *Data on File: Clinical Study Report - A Randomized, Double-Blind, Placebo-Controlled Study to Evaluate Efficacy and Safety of Nefecon in Patients with Primary IgA Nephropathy at Risk of Progressing to End-Stage Renal Disease (NefIgArd) (Data Cutoff Date of 05 October 2020 for Part A Analysis) - Version 1.0.*; 2021.31

**Supplementary Table 6.** Proportion of patients with ESRD on dialysis

| **ESRD stage** | **Proportion of patients (%)** |
| --- | --- |
| ESRD with dialysis | 40.51 |
| ESRD without dialysis | 59.49 |

**Abbreviations:** ESRD, end-stage renal disease.

Data from Hastings et al.16

**Supplementary Table 7** Monthly AE costs

| **TEAE** | **% inpatient AEs Nefecon** | **% inpatient AEs BSC** | **Unit cost: outpatient*** | **Unit cost:**  **inpatient**** | **Nefecon AE prevalence per cycle** | **BSC AE prevalence per cycle** |
| --- | --- | --- | --- | --- | --- | --- |
| Acne | 4% | 2% | $68.04 | $0 | 0.6% | 0.1% |
| Weight increase | 4% | 2% | $68.04 | $0 | 0.3% | 0.2% |
| Hypertension | 4% | 2% | $68.04 | $28,905 | 0.2% | 0.0% |
| Headache | 4% | 2% | $68.04 | $32,279 | 0.2% | 0.1% |
| Edema peripheral | 4% | 2% | $68.04 | $25,511 | 0.3% | 0.1% |
| Dyspepsia | 4% | 2% | $68.04 | $41,116 | 0.2% | 0.0% |
| Mood swings | 4% | 2% | $68.04 | $22,084 | 0.2% | 0.0% |
| Face edema | 4% | 2% | $68.04 | $33,018 | 0.3% | 0.0% |
| Cushingoid | 4% | 2% | $68.04 | $80,315 | 0.2% | 0.0% |
| Hirsutism | 4% | 2% | $68.04 | $59,767 | 0.2% | 0.0% |
| Upper respiratory tract infection | 4% | 2% | $68.04 | $24,100 | 0.0% | 0.2% |

**Abbreviations:** AE, adverse event; BSC, best supportive care; CPT, current procedural terminology; CSR, clinical study report; HCUP, Healthcare Cost and Utilization Project; TEAE, treatment-emergent adverse event.

Data from*proportion of severe TEAEs out of all TEAEs in each arm of NefIgArd (CSR)29; **(CPT Unit cost -99213)

**Supplementary Table 8.** Dialysis and transplant treatment costs

| **Dialysis costs** | **Unit cost (inflation-adjusted)** |
| --- | --- |
| Hemodialysis – Medicare39 | $105,600 |
| Peritoneal dialysis – Medicare39 | $89,226 |
| Hemodialysis – Commercial40 | $276,295 |
| Peritoneal dialysis – Commercial40 | $233,453 |
| **Transplant costs** | **Unit cost (inflation-adjusted)** |
| 30-day pre-transplant41 | $33,528 |
| Procurement41 | $116,784 |
| Hospital transplant admission41 | $156,156 |
| Physician during transplant admission41 | $26,863 |
| 180 days post-transplant discharge41 | $87,665 |
| Outpatient immunosuppressants and other medications41 | $32,708 |
| **Total** | **$453,703** |

**Supplementary Table 9.** Productivity loss costs (USD)

|  | **CKD 3a** | **CKD 3b** | **CKD 4** | **ESRD w/o dialysis** | **ESRD w dialysis** |
| --- | --- | --- | --- | --- | --- |
| Cost per week | $151 | $154 | $215 | $245 | $265 |
| Cost per month | $658 | $670 | $935 | $1,066 | $1,152 |

**Abbreviations:** CKD, chronic kidney disease; ESRD, end-stage renal disease; USD, United States dollar; w, with; w/o, without

**Supplementary Table 10.** Model health state utility data from the literature

| Model health state | Utility value |
| --- | --- |
| CKD 1 | 1.00 |
| CKD 2 | 0.90 |
| CKD 3 | 0.87 |
| CKD 4 | 0.85 |
| ESRD without dialysis | 0.85 |
| ESRD with dialysis | 0.77 |
| Post-transplant* | 0.87 |

**Abbreviations:** CKD, chronic kidney disease; ESRD, end-stage renal disease.

*Assumed to have the same utility as CKD 3 [expert opinion]

**Source:** Bureau of Labor Statistics. Usual Weekly Earnings of Wage and Salary Workers First Quarter 2021. Accessed November 16, 2021. https://www.bls.gov/news.release/pdf/wkyeng.pdf.48

**Supplementary Table 11.** Disutilities of TEAEs for Nefecon and BSC

| **AE** | **Disutility** | **Source** |
| --- | --- | --- |
| Acne | 0.00 | Assumption |
| Weight increase | 0.00 | Assumption |
| Hypertension | -0.03 | Sullivan et al., 200653 |
| Headache | -0.11 | Xu et al., 201054 |
| Edema peripheral | -0.05 | Assumed the same as cushingoid |
| Dyspepsia | -0.02 | Sullivan et al., 200653 |
| Mood swings | 0.00 | Assumption |
| Face edema | -0.05 | Assumed the same as cushingoid |
| Cushingoid | -0.05 | ICER, Evidence report, Deflazacort, Eteplirsen, and Golodirsen for Duchenne Muscular Dystrophy 201955 |
| Hirsutism | 0.00 | Assumption |
| Upper respiratory tract infection | -0.03 | Sullivan et al., 200653 |
| Transplant failure (acute rejection)** | -0.11 | Sussell et al., 200656 |

**Abbreviations:** AE, adverse event; BSC, best supportive care; ICER, Institute for Clinical and Economic Review; TEAEs, treatment emergent adverse events.

**post-transplant AE
